# Supplementary material for: Variance Component Analysis of a Multi-Site Study for the Reproducibility of Multiple Reaction Monitoring Measurements of Peptides in Human Plasma
Source: PubMed Central journal article supplement (PMC3027641; doi:10.1371/journal.pone.0014590), 2011-01-26
Supplement: pone.0014590.s001.pdf [file pone.0014590.s001.pdf]

Table S1. Covariance parameter estimates and Wald Z-test of heavy peptide data using **Model 1**.

| <b>Covariance Parameter</b>           | <b>Estimate</b> | <b>Standard Error</b> | <b>Z Value</b> | <b>Probability &gt; Z</b> |
|---------------------------------------|-----------------|-----------------------|----------------|---------------------------|
| <i>tech_replicate(study)</i>          | 0.0795          | 0.0795                | 1              | 0.1589                    |
| <i>site</i>                           | 0.6446          | 0.4183                | 1.54           | 0.0617                    |
| <i>peptide</i>                        | <b>1.1307</b>   | <b>0.6591</b>         | <b>1.72</b>    | <b>0.0431</b>             |
| <i>transition(peptide)</i>            | <b>0.8387</b>   | <b>0.2559</b>         | <b>3.28</b>    | <b>0.0005</b>             |
| <i>study*site</i>                     | <b>0.1716</b>   | <b>0.0771</b>         | <b>2.23</b>    | <b>0.013</b>              |
| <i>study*peptide</i>                  | <b>0.0477</b>   | <b>0.0248</b>         | <b>1.92</b>    | <b>0.0273</b>             |
| <i>site*peptide</i>                   | <b>0.1445</b>   | <b>0.0423</b>         | <b>3.42</b>    | <b>0.0003</b>             |
| <i>study*transition(peptide)</i>      | <b>0.0011</b>   | <b>0.0007</b>         | <b>1.73</b>    | <b>0.0419</b>             |
| <i>site*transition(peptide)</i>       | <b>0.0618</b>   | <b>0.0081</b>         | <b>7.66</b>    | <b>&lt;.0001</b>          |
| <i>study*site*peptide</i>             | <b>0.1790</b>   | <b>0.0243</b>         | <b>7.37</b>    | <b>&lt;.0001</b>          |
| <i>study*site*transition(peptide)</i> | 0               | .                     | .              | .                         |
| <i>residual</i>                       | <b>0.7511</b>   | <b>0.0046</b>         | <b>162.28</b>  | <b>&lt;.0001</b>          |
