# Supplementary material for: Variance Component Analysis of a Multi-Site Study for the Reproducibility of Multiple Reaction Monitoring Measurements of Peptides in Human Plasma
Source: PubMed Central journal article supplement (PMC3027641; doi:10.1371/journal.pone.0014590), 2011-01-26
Supplement: pone.0014590.s002.pdf [file pone.0014590.s002.pdf]

Table S2. Covariance parameter estimates and Wald Z-test of light peptide data using Model 2.

| <b>Covariance Parameter</b>                  | <b>Estimate</b> | <b>Standard Error</b> | <b>Z Value</b> | <b>Probability &gt; Z</b> |
|----------------------------------------------|-----------------|-----------------------|----------------|---------------------------|
| <i>tech_replicate(study)</i>                 | 0.0144          | 0.0145                | 0.99           | 0.1603                    |
| <i>site</i>                                  | 0.6983          | 0.4571                | 1.53           | 0.0633                    |
| <i>peptide</i>                               | 0.7213          | 0.5477                | 1.32           | 0.0939                    |
| <b><i>transition(peptide)</i></b>            | <b>0.6995</b>   | <b>0.2210</b>         | <b>3.16</b>    | <b>0.0008</b>             |
| <b><i>study*site</i></b>                     | <b>0.2027</b>   | <b>0.0893</b>         | <b>2.27</b>    | <b>0.0116</b>             |
| <b><i>study*peptide</i></b>                  | <b>0.6181</b>   | <b>0.2092</b>         | <b>2.95</b>    | <b>0.0016</b>             |
| <b><i>site*peptide</i></b>                   | <b>0.1693</b>   | <b>0.0493</b>         | <b>3.44</b>    | <b>0.0003</b>             |
| <b><i>study*transition(peptide)</i></b>      | <b>0.0537</b>   | <b>0.0126</b>         | <b>4.27</b>    | <b>&lt;.0001</b>          |
| <b><i>site*transition(peptide)</i></b>       | <b>0.0948</b>   | <b>0.0135</b>         | <b>7.04</b>    | <b>&lt;.0001</b>          |
| <b><i>study*site*peptide</i></b>             | <b>0.1605</b>   | <b>0.0232</b>         | <b>6.92</b>    | <b>&lt;.0001</b>          |
| <b><i>study*site*transition(peptide)</i></b> | <b>0.0223</b>   | <b>0.0034</b>         | <b>6.65</b>    | <b>&lt;.0001</b>          |
| <i>residual</i>                              | 0.7545          | 0.0054                | 139.22         | <.0001                    |
